# Supplementary material for: Host age and Plasmodium falciparum multiclonality are associated with gametocyte prevalence: a 1-year prospective cohort study
Source: Springer Nature journal article supplement (doi:10.1186/s12936-017-2123-2), 2017-11-20
Supplement: MOESM2 [file 15240934]

**Additional file 2: Effect of RBC polymorphisms on gametocyte positive rate**

For each individual, gametocyte positivity throughout the study (number of gametocyte positive samples out of Pf positive samples) was calculated. Then multiple linear regression was performed using the gametocyte positivity as a determinant variable

**Total Effect Test**

|                       | p-value |
|-----------------------|---------|
| Age group             | 0.0003  |
| Gender                | 0.4093  |
| ABO                   | 0.4288  |
| Rh                    | 0.9842  |
| Hb Type               | 0.3161  |
| G6PD deficiency       | 0.7626  |
| $\alpha$ -thalassemia | 0.1730  |

A total of 369 volunteers were Pf positive at least once in this study and included in the above analysis. The number of volunteers in each category is shown in the bottom tables

| Age group   | N  |
|-------------|----|
| 1-3 years   | 42 |
| 4-6 years   | 56 |
| 7-9 years   | 78 |
| 10-12 years | 70 |
| 13-17 years | 49 |
| 18-35 years | 39 |
| >35 years   | 35 |

| Gender | N   |
|--------|-----|
| Female | 202 |
| Male   | 167 |

| ABO | N   |
|-----|-----|
| A   | 119 |
| B   | 98  |
| AB  | 29  |
| o   | 123 |

| Rh       | N   |
|----------|-----|
| Positive | 350 |
| Negative | 19  |

| Hb Type | N   |
|---------|-----|
| WT      | 284 |
| AC      | 33  |
| AS      | 49  |
| CC      | 1   |
| SC      | 2   |

| G6PD deficiency | N   |
|-----------------|-----|
| WT              | 308 |
| A+/-            | 42  |
| A-              | 19  |

| $\alpha$ -thalassemia | N   |
|-----------------------|-----|
| WT                    | 243 |
| Hetero                | 118 |
| Homo                  | 8   |
