# Supplementary material for: Host age and Plasmodium falciparum multiclonality are associated with gametocyte prevalence: a 1-year prospective cohort study
Source: Springer Nature journal article supplement (doi:10.1186/s12936-017-2123-2), 2017-11-20

**A.****Jun****Nov****Feb****Apr**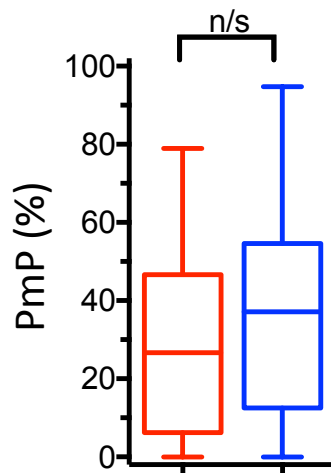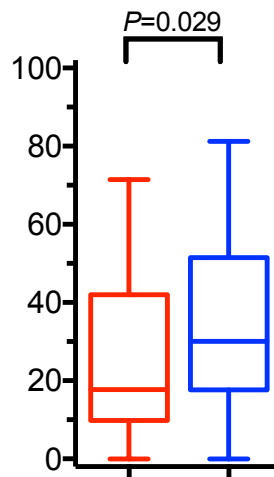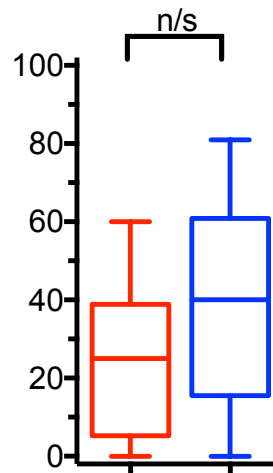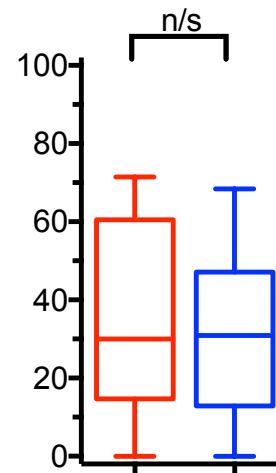**B.**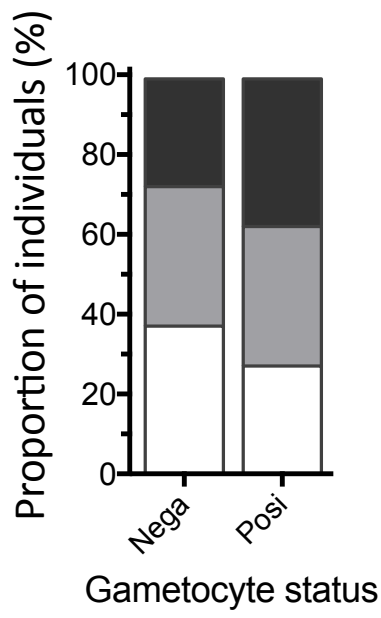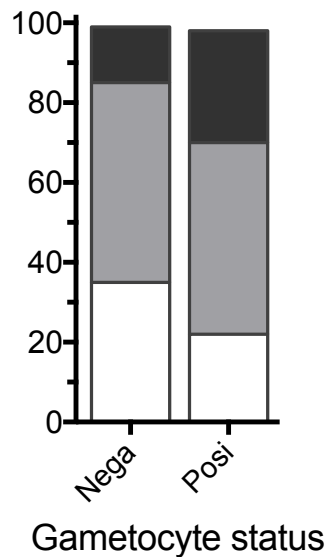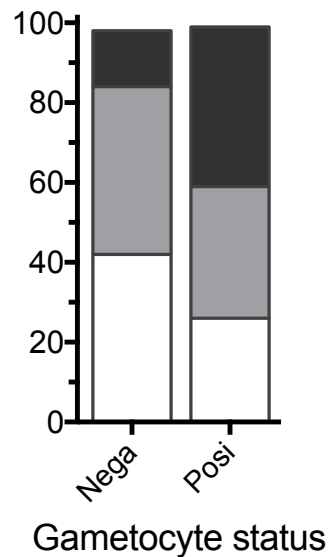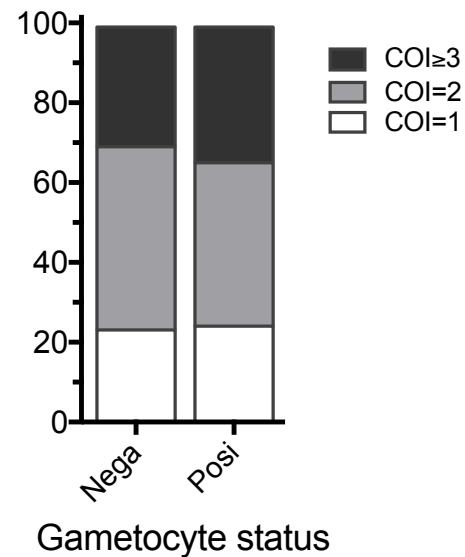

Supplement: MOESM3 [file 15240934]
